# Supplementary material for: Microtubules as platforms for probing liquid–liquid phase separation in cells – application to RNA-binding proteins
Source: PubMed Central journal article supplement (PMC6031325; doi:10.1242/jcs.214692), 2018-06-11
Supplement: joces-131-214692-s1.pdf [file joces-131-214692-s1.pdf]

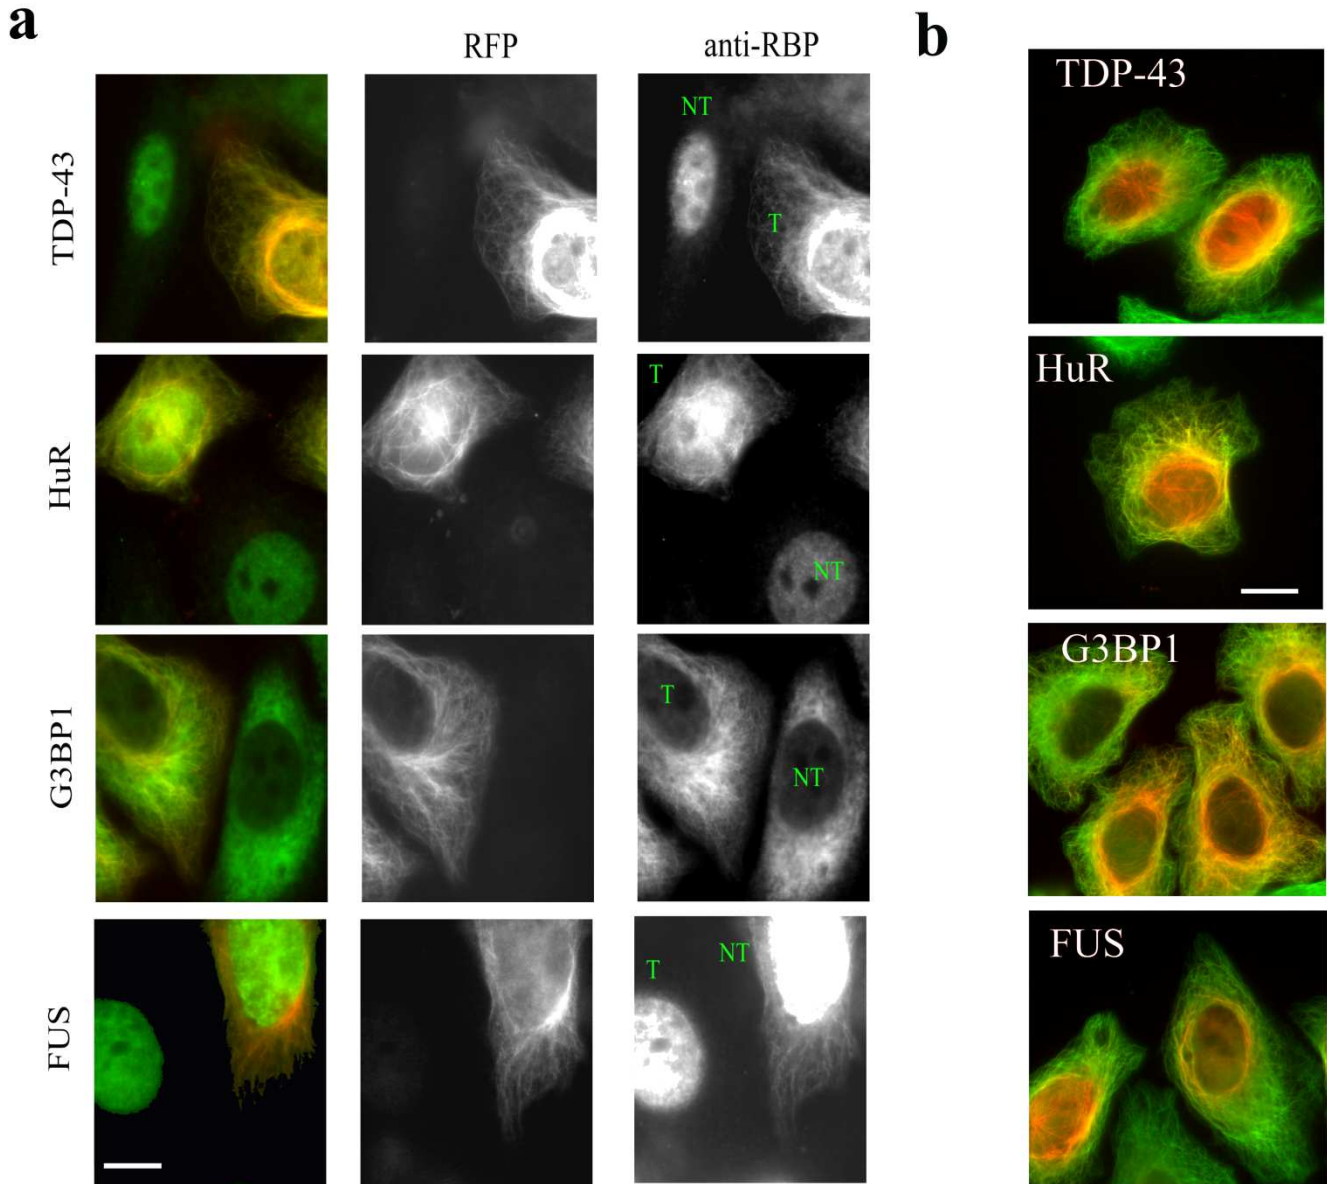

Figure S1

**Supplementary figure 1: Tau-RBPs were detected on microtubules with specific anti-RBP antibodies. RBPs display a preferential perinuclear location on microtubules.**

**a**, In HeLa cells transfected with plasmids encoding for indicated tau-RFP-RBPs, the presence of RBPs was detected by using specific anti-RBPs antibodies (see supplemental table 2). NT: Non transfected cells expressing endogenous RBPs. T: transfected cells expressing indicated tau-RFP-RBPs. In transfected cells, we noted the appearance of microtubules with contrasts with non-transfected cells. **b**, Fluorescence images of HeLa cells expressing indicated tau-RFP-RBPs. Red (tau-RFP-RBP), Green (microtubules anti-tubulin antibody). Scale bars: 10  $\mu$ m



**Supplementary figure 2: Arsenite stress increases mRNA enrichment on microtubules of tau-RFP-RBP expressing cells.**

**a**, Spatial distribution of indicated tau-RFP-RBP and mRNA in HeLa cells. mRNAs were detected by fluorescent poly(T) probes (in green). Tau-RFP-RBP (in red). Red arrows indicate the presence of microtubule-bound mRNA in cells expressing tau-RFP-RBP for control conditions. However, the enrichment of mRNA on microtubules is more pronounced after arsenite stress compared to control. Importantly, tau-RFP-RBP does not bring mRNA on microtubules in either control or arsenite-treated cells. Scale bar: 10  $\mu$ m. **b**, Spearman coefficient (correlation score) of mRNA and tau-RFP-G3BP1 fluorescence on microtubules (n=10, \*\*P<0.01, \*P<0.05, two-tailed t test versus control). Dot Radii, R, are proportional to RFP fluorescence. Arsenite was washed out to enable stress granule dissociation. Dot color represents the percentage of cells displaying stress granules among cells non-expressing tau-RFP-YB-1 (n=400). Scale bars: 10  $\mu$ m

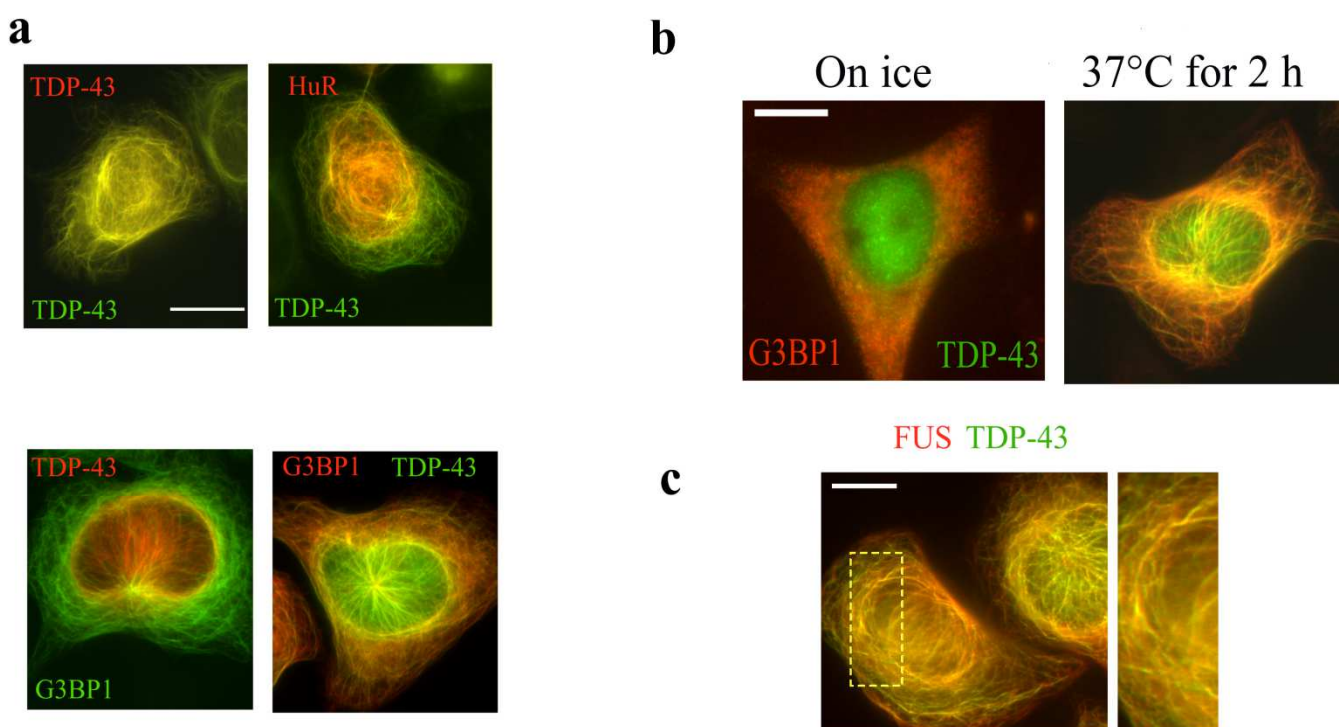

Figure S3

**Supplementary figure 3: RBP couples segregate into distinct sub-compartments when coexisting on microtubules.**

**a**, Spatial distribution of indicated GFP or RFP-fused tau-RBPs in HeLa Cells. Tau-GFP-RBP (in green). Tau-RFP-RBP (in red). Formation of distinct sub-compartments is observed for most cases, unless the same RBP was fused to tau-GFP and tau-RFP. **b**, HeLa cells expressing tau-GFP-TDP-43 and tau-RFP-G3BP1 were first placed on ice for 1 h to dissociate microtubules. Then, microtubules regrowth was triggered at 37°C for 1 h. Scale bar: 10  $\mu$ m. **c**, Spatial distribution of tau-GFP-TDP-43 or tau-RFP-FUS in HeLa Cells. Note that tau-RFP-FUS and tau-GFP-TDP-43 partly share the same compartments. Scale bar: 10  $\mu$ m

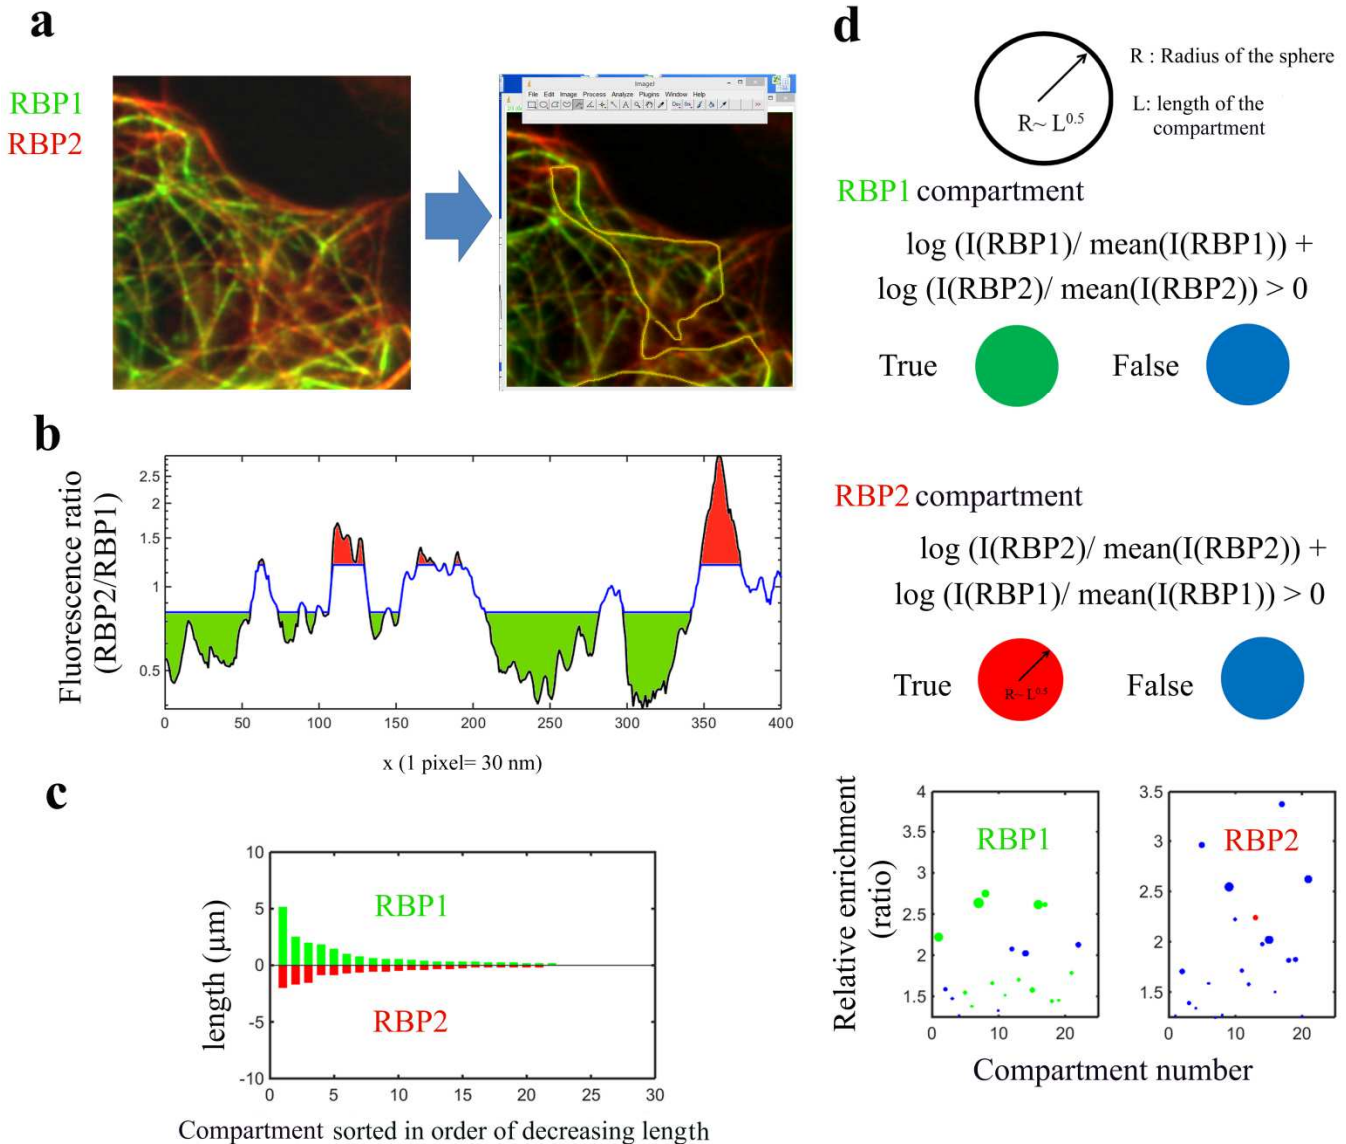

Figure S4

**Supplementary figure 4: Analysis of sub-compartmentalization on microtubules.**

**a**, Using ImageJ free hand tool, a line (yellow) along the microtubule network is drawn in cells expressing tau-GFP-RBP1 and tau-RFP-RBP2. Here RBP1 is TDP-43 and RBP2 is G3BP1. **b**, When the fluorescence RBP1/RBP2 ratio differs by more than 20% from its mean value, we consider the formation of RBP1 or RBP2 compartments. **c**, RBP1 or RBP2 compartments are sorted according to their length. **d**, Lower panel, the relative enrichment of the RBP1 and RBP2 compartment is represented. The radius of the sphere, R, is proportional to the square root of the compartment length, L. The color indicates whether compartmenting mostly results from RBP enrichment (in red for RBP1, in green for RBP2) or the depletion of the coexisting RBP (in blue).

## Movies

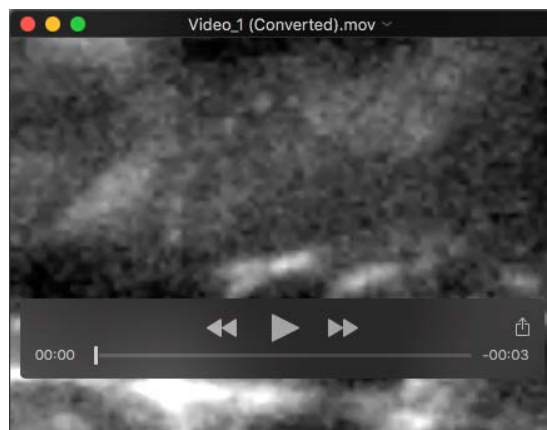

### **Movie 1: Tau-GFP-TDP-43 forms dynamics compartments on microtubules.**

Tau-GFP-TDP-43 in HeLa Cells. Time interval: 30 sec. Total duration: 15 min. Representative recordings of three independent experiments.

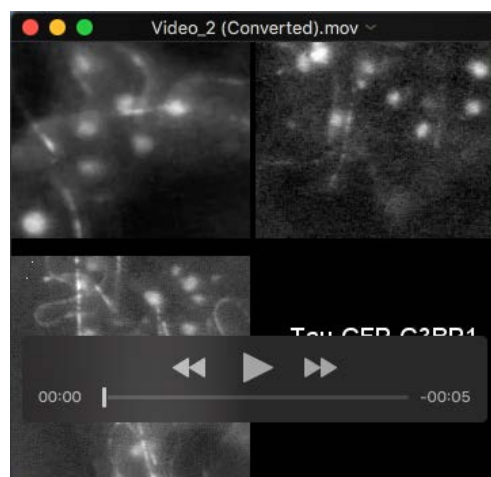

### **Movie 2: Stress granules interact with microtubules in Tau-GFP-G3BP1-expressing cells.**

Fluorescence video-microscopy recordings of HeLa cells expressing Tau-GFP-G3BP1. Cells were treated with arsenite (300  $\mu$ M) and nocodazole (500 nM) for 60 min. Time interval: 30 sec. Total duration: 7 min 30 s. Recordings of three different areas.

## SUPPLEMENTARY TABLES

### Supplementary table 1: List of plasmids

| Plasmids      | Expression vectors | RBP accession numbers |
|---------------|--------------------|-----------------------|
| Tau-RFP-TDP43 | PEF-DEST51         | NP_031401.1           |
| Tau-RFP-FUS   | PEF-DEST51         | NP_004951.1           |
| Tau-RFP-HUR   | PEF-DEST51         | NP_001410             |
| Tau-RFP-G3BP1 | PEF-DEST51         | NP_005745.1           |
| Tau-GFP-TDP43 | PEF-DEST51         | NP_031401.1           |
| Tau-GFP-G3BP1 | PEF-DEST51         | NP_005745.1           |
| GFP-HUR       | pEGFP-C3           | NP_001410             |

### Supplementary tables S2 and S3: Antibodies and

#### Reagents Table S2 : List of primary antibodies

| GENE    | Antibody reference                                                | Dilution |
|---------|-------------------------------------------------------------------|----------|
| TDP-43  | Anti-TDP-43 (Proteintech, 12892-1), produced in rabbit            | 1:2000   |
| FUS     | Anti-FUS (Novus, NBP2-52874), clone 190, produced in mouse        | 1:1000   |
| HuR     | Anti-HuR / ELAVL1 antibody (Abcam, ab54987,) produced in mouse    | 1:2000   |
| G3BP1   | Anti-G3BP antibody (Sigma, G6046) produced in rabbit              | 1:1000   |
| Tubulin | Mouse monoclonal anti-beta-tubulin antibody (Home made, clone E7) | 1:4000   |

#### Table S3: List of reagents or resources

| REAGENT or RESOURCE             | SOURCE                  | IDENTIFIER  |
|---------------------------------|-------------------------|-------------|
| Sodium (meta)arsenite           | Sigma                   | S7400       |
| Nocodazole                      | Sigma                   | M1404       |
| Lipofectamine 2000              | Thermofisher scientific | 11668-019   |
| Heat inactivated FBS            | Life technologie        | 10500-064   |
| DMEM+glutamax                   | Life technologie        | 31966-021   |
| Alexa fluor 594 goat anti-mouse | Invitrogen              | A11005      |
| Alexa fluor 488 goat anti-mouse | Invitrogen              | A21121      |
| Paraformaldehyde                | Alfa Aesar              | 43368       |
| CELLS                           | SOURCE                  | IDENTIFIER# |
| HeLa                            | ATCC                    | CCL-2       |

Requests for reagents may be directed to, and will be fulfilled by the lead contact David Pastré.
